# Supplementary material for: Influence of metal oxide and heteropoly tungstate location in mesoporous silica towards catalytic transfer hydrogenation of furfural to γ-valerolactone
Source: Royal Society of Chemistry journal article supplement (doi:10.1039/d1se00340b), 2021-01-01
Supplement: d1se00340b1.pdf [file d1se00340b1.pdf]

*Supplementary Information*

**Influence of metal oxide and heteropoly tungstate location in mesoporous silica towards catalytic transfer hydrogenation of furfural to  $\gamma$ -valerolactone**

B. Srinivasa Rao <sup>a,b</sup>, Yogita <sup>a,b</sup>, D. Dhana Lakshmi <sup>a,b</sup>, P. Krishna Kumari <sup>a,b</sup> and N. Lingaiah <sup>a,b</sup> \*

<sup>a</sup>Department of Catalysis and Fine Chemicals, CSIR-Indian Institute of Chemical Technology, Hyderabad-500 007, India.

<sup>b</sup>CSIR-Academy of Scientific and Innovative Research (CSIR-AcSIR), New Delhi, India.

\*Corresponding author

Email: [nakkalingaiah@iict.res.in](mailto:nakkalingaiah@iict.res.in); Tel: +91-40-2719172

Table S1: Textural properties of SBA-15 and modified catalysts

| S.No | Catalyst                    | SA<br>(m <sup>2</sup> /g) | Vp<br>(cm <sup>3</sup> /g) | Dp<br>(nm) | d <sub>100</sub><br>(nm) | a <sub>0</sub><br>(nm) | t <sub>w</sub><br>(nm) |
|------|-----------------------------|---------------------------|----------------------------|------------|--------------------------|------------------------|------------------------|
| 1    | SBA-15                      | 673                       | 0.96                       | 7.82       | 9.32                     | 10.98                  | 3.16                   |
| 2    | 20%ZrO <sub>2</sub> -SBA-15 | 542                       | 0.81                       | 7.18       | 9.22                     | 10.65                  | 3.47                   |
| 3    | 10%TPA-SBA-15               | 583                       | 0.86                       | 7.38       | 9.26                     | 10.69                  | 3.34                   |
| 4    | 20%ZrO <sub>2</sub> /10%TPA | 462                       | 0.58                       | 7.18       | 9.22                     | 10.65                  | 3.47                   |
| -    | SBA-15                      |                           |                            |            |                          |                        |                        |
| 5    | 10%TPA/20%ZrO <sub>2</sub>  | 445                       | 0.44                       | 6.28       | 9.19                     | 10.61                  | 4.33                   |
| -    | SA-SBA-15                   |                           |                            |            |                          |                        |                        |

surface area, Vp- total pore volume calculated from BET method, Dp -pore diameter calculated

from BJH method,  $d_{(100)}$ - d-spacing,  $a_0$ - unit cell parameter calculated from Low angle XRD,  $t_w$ - pore wall thickness calculated using  $a_0$ -Dp

---

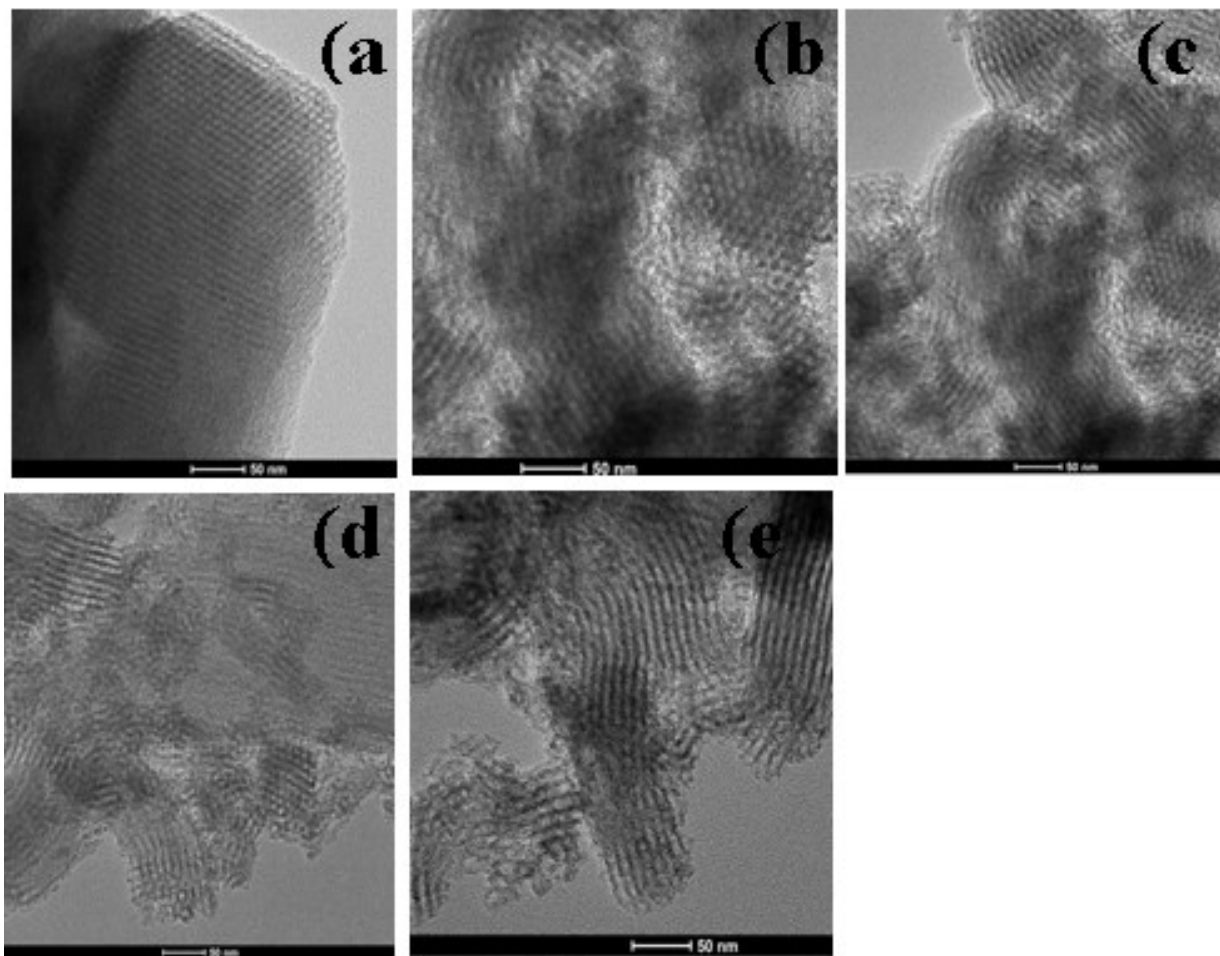

Fig. S1. TEM images of (a) SBA-15, (b) 10%TPA-SBA-15, (c) 20%ZrO<sub>2</sub>/10%TPA-SBA-15, (d) 20%ZrO<sub>2</sub>-SBA-15 (e) 10%TPA/20%ZrO<sub>2</sub>-SBA-15.

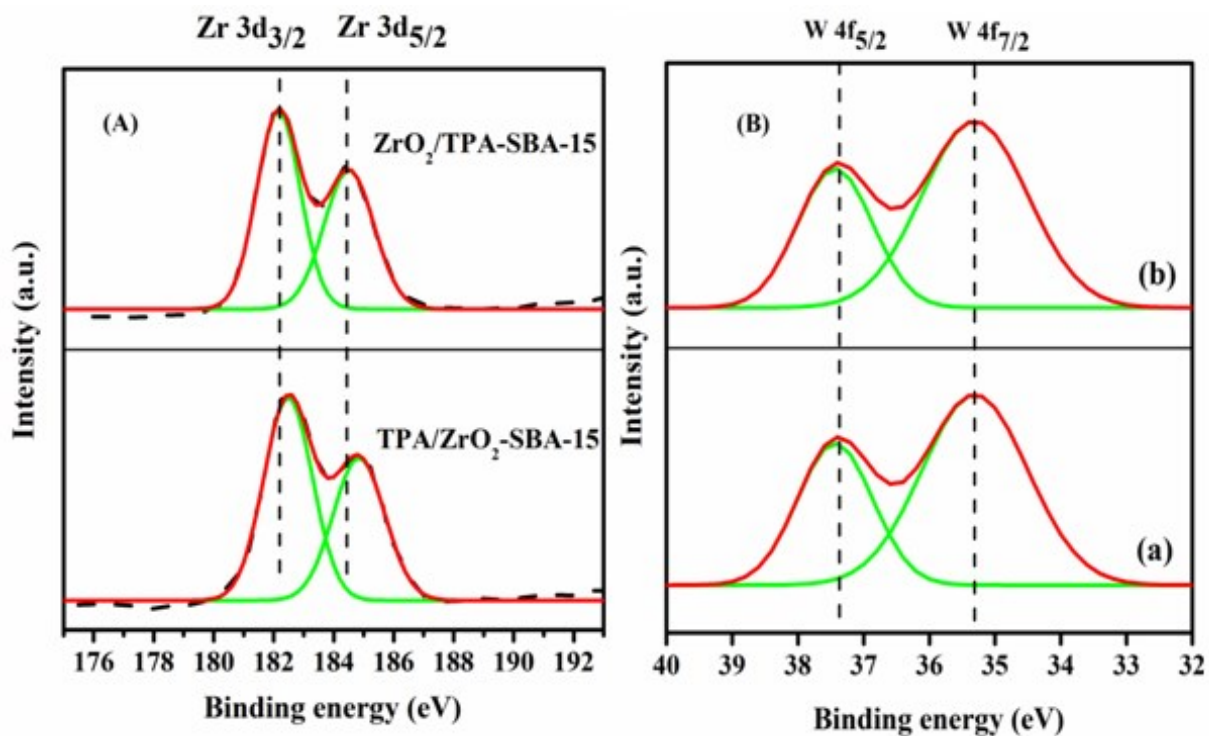

Fig. S2. XPS spectra of the catalysts. (A) Zr 3d, (B) W4f
